# Supplementary material
Source: HighWire-hosted journal article supplement (https://innovations.bmj.com/highwire/filestream/138286/field_highwire_adjunct_files/0/bmjinnov-2021-000662supp001_data_supplement.pdf)
Supplement: bmjinnov-2021-000662supp001_data_supplement.pdf [file bmjinnov-2021-000662supp001_data_supplement.pdf]

## Supplementary file S1

### Immersive virtual reality coronary revascularization heart team meeting questionnaire

How often do you participate in coronary revascularization heart team meetings?

1. I never participate in coronary revascularization heart team meetings
2. I participate incidentally (less than once per month) in coronary revascularization heart team meetings
3. I participate sometimes (1-2 times / month) in coronary revascularization heart team meetings
4. I participate often (every week) in coronary revascularization heart team meetings

How many years of experience do you have in participating in coronary revascularization heart team meetings?

1. I have 0-1 years of experience in participating in coronary revascularization heart team meetings
2. I have 1-3 years of experience in participating in coronary revascularization heart team meetings.
3. I have 3-5 years of experience in participating in coronary revascularization heart team meetings.
4. I have >5 years of experience in participating in coronary revascularization heart team meetings.

How often do you use Virtual Reality hardware/software (e.g. virtual reality gaming, virtual reality simulations, virtual reality consoles, etc.)?

1. I have no experience (I never had VR experience until today)
2. I have basic experience (I have had some incidental VR experiences before, e.g. gaming, entertainment, etc.)
3. I am experienced (I use VR consoles and applications on a regular basis).
4. I am an expert (I have a VR console and applications myself).

Do you have any experience in immersive (virtual reality-based) remote meetings?

1. Yes
2. No

## Ease of Use

1. The VR software (MeetinVR) and hardware (VR headset/controllers) are easy to use.

|                     |            |                     |               |                        |
|---------------------|------------|---------------------|---------------|------------------------|
| 5<br>Strongly Agree | 4<br>Agree | 3<br>Neither Or N/A | 2<br>Disagree | 1<br>Strongly Disagree |
|---------------------|------------|---------------------|---------------|------------------------|

2. Learning to operate on the hardware and software was easy.

|                     |            |                     |               |                        |
|---------------------|------------|---------------------|---------------|------------------------|
| 5<br>Strongly Agree | 4<br>Agree | 3<br>Neither Or N/A | 2<br>Disagree | 1<br>Strongly Disagree |
|---------------------|------------|---------------------|---------------|------------------------|

3. Communicating (verbal and non-verbal) in this virtual reality environment is easy.

|                     |            |                     |               |                        |
|---------------------|------------|---------------------|---------------|------------------------|
| 5<br>Strongly Agree | 4<br>Agree | 3<br>Neither Or N/A | 2<br>Disagree | 1<br>Strongly Disagree |
|---------------------|------------|---------------------|---------------|------------------------|

4. Moving around in this virtual reality environment is easy.

|                     |            |                     |               |                        |
|---------------------|------------|---------------------|---------------|------------------------|
| 5<br>Strongly Agree | 4<br>Agree | 3<br>Neither Or N/A | 2<br>Disagree | 1<br>Strongly Disagree |
|---------------------|------------|---------------------|---------------|------------------------|

5. Pointing out specific objects (such as coronary lesions) is easy.

|                     |            |                     |               |                        |
|---------------------|------------|---------------------|---------------|------------------------|
| 5<br>Strongly Agree | 4<br>Agree | 3<br>Neither Or N/A | 2<br>Disagree | 1<br>Strongly Disagree |
|---------------------|------------|---------------------|---------------|------------------------|

## Usefulness and effectiveness

1. Immersive VR meeting helps me to review imaging modalities (such as coronary angiograms, echocardiograms, X-ray, etc.) effectively.

|                     |            |                     |               |                        |
|---------------------|------------|---------------------|---------------|------------------------|
| 5<br>Strongly Agree | 4<br>Agree | 3<br>Neither Or N/A | 2<br>Disagree | 1<br>Strongly Disagree |
|---------------------|------------|---------------------|---------------|------------------------|

2. Immersive VR meeting helps me to provide clinical advice and recommendations in an effective way.

|                     |            |                     |               |                        |
|---------------------|------------|---------------------|---------------|------------------------|
| 5<br>Strongly Agree | 4<br>Agree | 3<br>Neither Or N/A | 2<br>Disagree | 1<br>Strongly Disagree |
|---------------------|------------|---------------------|---------------|------------------------|

3. Immersive VR meeting is a useful method for remote multidisciplinary coronary revascularization heart team meeting.

|                     |            |                     |               |                        |
|---------------------|------------|---------------------|---------------|------------------------|
| 5<br>Strongly Agree | 4<br>Agree | 3<br>Neither Or N/A | 2<br>Disagree | 1<br>Strongly Disagree |
|---------------------|------------|---------------------|---------------|------------------------|

4. I would recommend immersive VR meeting to other colleagues for remote multidisciplinary meetings.

|                     |            |                     |               |                        |
|---------------------|------------|---------------------|---------------|------------------------|
| 5<br>Strongly Agree | 4<br>Agree | 3<br>Neither Or N/A | 2<br>Disagree | 1<br>Strongly Disagree |
|---------------------|------------|---------------------|---------------|------------------------|

### Immersiveness (virtual reality)

1. A virtual reality based multidisciplinary coronary revascularization heart team meeting is reality-like.

|                     |            |                     |               |                        |
|---------------------|------------|---------------------|---------------|------------------------|
| 5<br>Strongly Agree | 4<br>Agree | 3<br>Neither Or N/A | 2<br>Disagree | 1<br>Strongly Disagree |
|---------------------|------------|---------------------|---------------|------------------------|

2. When using VR, I felt actively involved in the heart team discussion.

|                     |            |                     |               |                        |
|---------------------|------------|---------------------|---------------|------------------------|
| 5<br>Strongly Agree | 4<br>Agree | 3<br>Neither Or N/A | 2<br>Disagree | 1<br>Strongly Disagree |
|---------------------|------------|---------------------|---------------|------------------------|

3. When using VR, I did not feel any external (such as visual, auditory) distractions.

|                     |            |                     |               |                        |
|---------------------|------------|---------------------|---------------|------------------------|
| 5<br>Strongly Agree | 4<br>Agree | 3<br>Neither Or N/A | 2<br>Disagree | 1<br>Strongly Disagree |
|---------------------|------------|---------------------|---------------|------------------------|

4. The audio (sounds) and video within the virtual environment were of high quality.

|                     |            |                     |               |   |
|---------------------|------------|---------------------|---------------|---|
| 5<br>Strongly Agree | 4<br>Agree | 3<br>Neither Or N/A | 2<br>Disagree | 1 |
|---------------------|------------|---------------------|---------------|---|

|  |  |  |  |                   |
|--|--|--|--|-------------------|
|  |  |  |  | Strongly Disagree |
|--|--|--|--|-------------------|

5. The methods of interaction within the software feel intuitive.

|                     |            |                     |               |                        |
|---------------------|------------|---------------------|---------------|------------------------|
| 5<br>Strongly Agree | 4<br>Agree | 3<br>Neither Or N/A | 2<br>Disagree | 1<br>Strongly Disagree |
|---------------------|------------|---------------------|---------------|------------------------|

## Alternative meeting methods

1. Regarding ease-of-use, **virtual reality** conferencing is a..... way for organizing remote heart team meetings when compared to **tele/video** conferencing.

|                  |                      |              |                     |                 |
|------------------|----------------------|--------------|---------------------|-----------------|
| 5<br>Much Better | 4<br>Somewhat better | 3<br>Similar | 2<br>Somewhat worse | 1<br>Much Worse |
|------------------|----------------------|--------------|---------------------|-----------------|

2. Regarding usefulness and effectiveness, **virtual reality** conferencing is a..... way for organizing remote multidisciplinary heart team meetings when compared to **tele/video** conferencing.

|                  |                      |              |                     |                 |
|------------------|----------------------|--------------|---------------------|-----------------|
| 5<br>Much Better | 4<br>Somewhat better | 3<br>Similar | 2<br>Somewhat worse | 1<br>Much Worse |
|------------------|----------------------|--------------|---------------------|-----------------|

3. Regarding usefulness and effectiveness, **virtual reality** conferencing is a..... way for organizing remote multidisciplinary heart team meetings when compared to **physical meetings**.

|   |   |   |   |   |
|---|---|---|---|---|
| 5 | 4 | 3 | 2 | 1 |
|---|---|---|---|---|

|             |                 |         |                |            |
|-------------|-----------------|---------|----------------|------------|
| Much Better | Somewhat better | Similar | Somewhat worse | Much Worse |
|-------------|-----------------|---------|----------------|------------|

4. Regarding immersiveness (engagement in virtual environment), **virtual reality** conferencing is a..... way for organizing remote multidisciplinary heart team meetings when compared to **tele/video** conferencing.

|                  |                      |              |                     |                 |
|------------------|----------------------|--------------|---------------------|-----------------|
| 5<br>Much Better | 4<br>Somewhat better | 3<br>Similar | 2<br>Somewhat worse | 1<br>Much Worse |
|------------------|----------------------|--------------|---------------------|-----------------|

## Attitude towards (future) use

1. VR meetings are a good method for future remote coronary revascularization heart team meetings.

|                     |            |                     |               |                        |
|---------------------|------------|---------------------|---------------|------------------------|
| 5<br>Strongly Agree | 4<br>Agree | 3<br>Neither Or N/A | 2<br>Disagree | 1<br>Strongly Disagree |
|---------------------|------------|---------------------|---------------|------------------------|

2. I would like to work with this technology in the future.

|                     |            |                     |               |                        |
|---------------------|------------|---------------------|---------------|------------------------|
| 5<br>Strongly Agree | 4<br>Agree | 3<br>Neither Or N/A | 2<br>Disagree | 1<br>Strongly Disagree |
|---------------------|------------|---------------------|---------------|------------------------|

3. I enjoyed using VR for remote multidisciplinary meetings.

|                     |            |                     |               |                        |
|---------------------|------------|---------------------|---------------|------------------------|
| 5<br>Strongly Agree | 4<br>Agree | 3<br>Neither Or N/A | 2<br>Disagree | 1<br>Strongly Disagree |
|---------------------|------------|---------------------|---------------|------------------------|

4. In the future, I prefer using virtual reality conferencing methods over **tele/video** conferencing methods.

|                     |            |                     |               |                        |
|---------------------|------------|---------------------|---------------|------------------------|
| 5<br>Strongly Agree | 4<br>Agree | 3<br>Neither Or N/A | 2<br>Disagree | 1<br>Strongly Disagree |
|---------------------|------------|---------------------|---------------|------------------------|

5. In the future, I prefer using virtual reality conferencing methods over **physical** conferencing methods.

|                     |            |                     |               |                        |
|---------------------|------------|---------------------|---------------|------------------------|
| 5<br>Strongly Agree | 4<br>Agree | 3<br>Neither Or N/A | 2<br>Disagree | 1<br>Strongly Disagree |
|---------------------|------------|---------------------|---------------|------------------------|

**Please provide advantages and disadvantages of immersive VR technology for organizing multidisciplinary meetings (please rank in order of importance (*start with the most important (dis)advantages*))**

Advantages:

1. ....
2. ....
3. ....

Disadvantages:

1. ....
2. ....
3. ....

**Did you feel that there were missing features in this virtual reality environment?**

.....

**Thank you for your participation**
